# Supplementary material for: High Power Generation with Reducing Agents Using Compost Soil as a Novel Electrocatalyst for Ammonium Fuel Cells
Source: MDPI journal article supplement (doi:10.3390/nano12081281), 2022-04-09
Supplement: s1 [file s1]

# High Power Generation with Reducing Agents Using Compost Soil as a Novel Electrocatalyst for Ammonium Fuel Cells

Verjesh Kumar Magotra <sup>1</sup>, Seung Joo Lee <sup>1</sup>, Tae Won Kang <sup>1</sup>, Akbar I. Inamdar <sup>2</sup>, Deuk Young Kim <sup>2</sup>, Hyunsik Im <sup>2</sup> and Hee Chang Jeon <sup>1,\*</sup>

<sup>1</sup> Nano Information Technology Academy, Dongguk University, Jung-Gu, Seoul 100715, Korea; birju.srm@gmail.com (V.K.M.); leesj@dongguk.edu (S.J.L.); twkang@dongguk.edu (T.W.K.)

<sup>2</sup> Division of Physics and Semiconductor Science, Dongguk University, Jung-Gu, Seoul 100715, Korea; akbarphysics2002@gmail.com (A.I.I.); dykim@dongguk.edu (D.Y.K.); hyunsik7@dongguk.edu (H.I.)

\* Correspondence: hcjeon@dongguk.edu

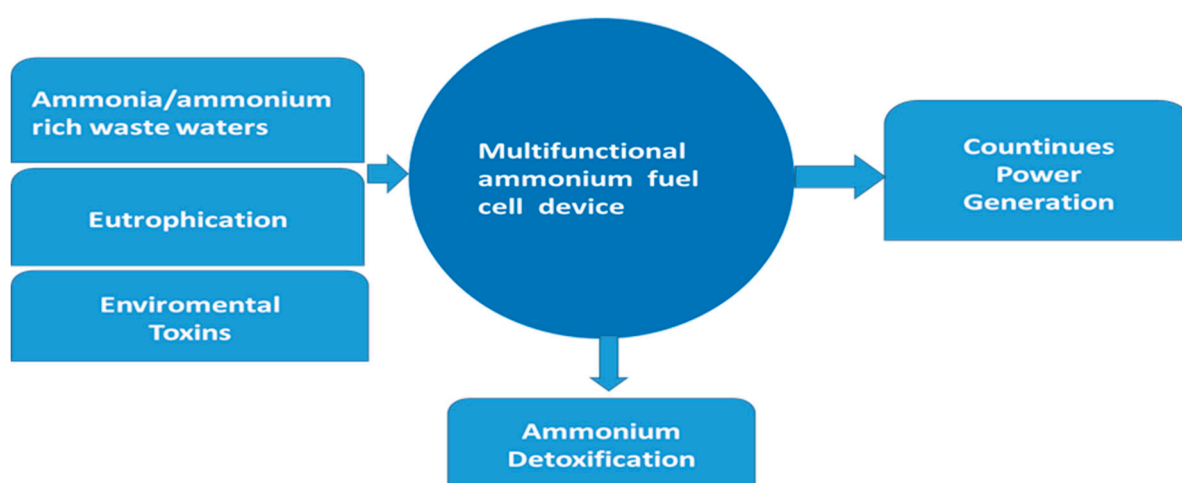

**Figure S1.** The schematic diagram showing the vision of this paper is shown in Figure S1. This figure highlights the use of the multifunctional device for environmental detoxification and continuous power generation.

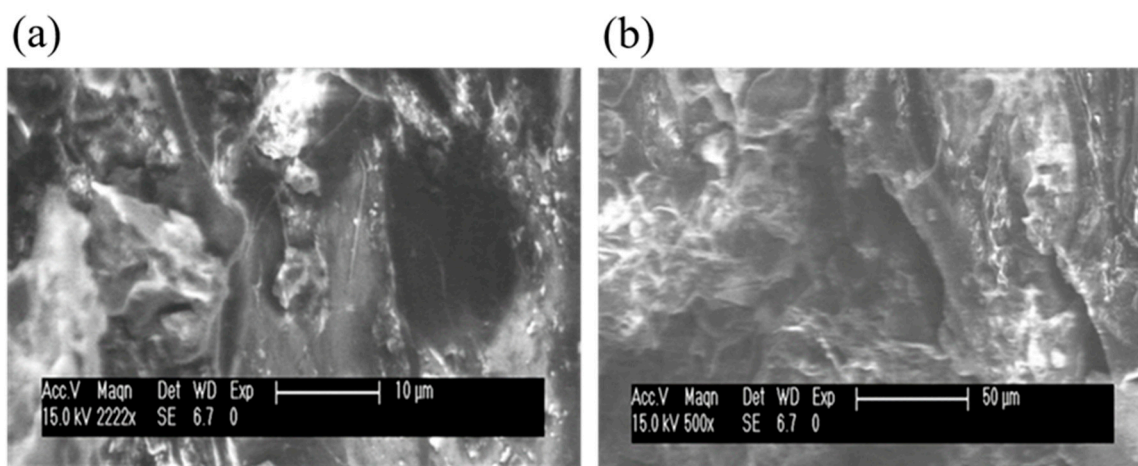

**Figure S2.** (a,b) Explain the SEM image to study the surface texture of the compost soil at different measurements 10 μm to 50 μm.

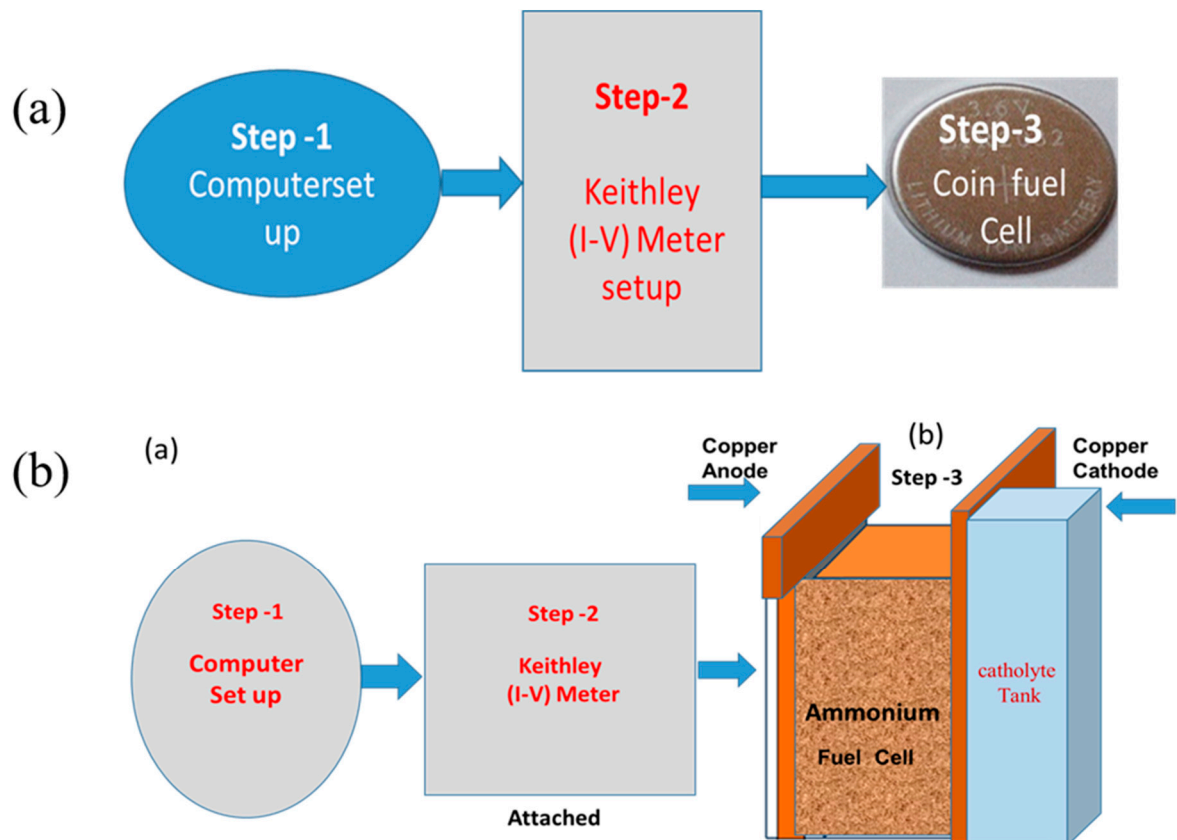

**Figure S3.** (a,b). Block diagram of the setup used for potential-static electrical measurements of ammonium fuel cell in a coin cell geometry and for Multifunctional ammonium fuel cell. (a) Keithley (IV) Electrical Measurement Setup for CS-AFC coin Cell small size design adjusted according to the voltage window, (b) Electrical Measurement Setup for multifunctional bulk compost soil Ammonium Fuel Cell (CS-AFC) design for big commercial model.

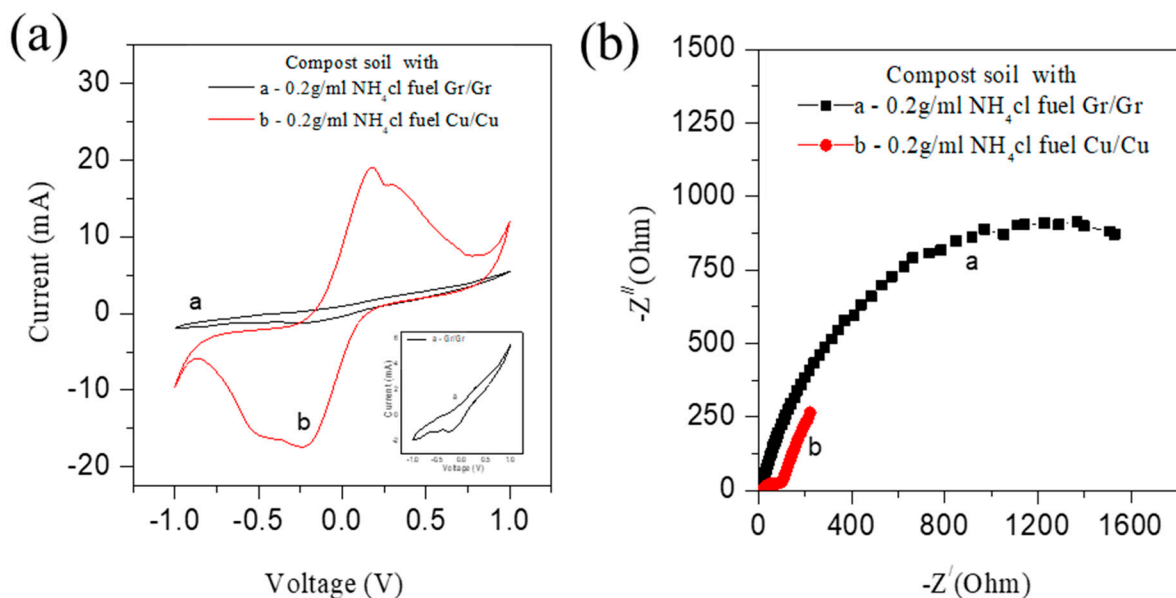

**Figure S4.** Effect of bipolar CV studies between Cu/Cu and Gr/Gr electrodes and its introductory study checked without membrane (a) CS-AFC (b) EIS studies shows that in comparison between G/G and Cu/Cu electrodes and the overall performance of Cu/Cu combination is best for power generation.

| S/No                                             | Type of Electrode | Fuel used         | Power density             | MFC Type     | Referecnes | Year         |
|--------------------------------------------------|-------------------|-------------------|---------------------------|--------------|------------|--------------|
| 1                                                | Gr/Gr             | Urea              | 3mw/m2                    | Soil         | 26         | 2020         |
| 2                                                | Gr/Gr             | Urea              | 18mw/m <sup>2</sup>       | Soil         | 34         | 2020         |
| 3                                                | Gr/Gr             | Ammonium Chloride | 0.78 mA                   | Liquid state | 2          | 2007         |
| 4                                                | Gr/Gr             | Glucose           | 32mW/m <sup>2</sup>       | soil         | 15         | 2010         |
| 5                                                | Cu/Cu             | Ammonium chloride | 108 mW/m <sup>2</sup>     | Soil         | 4          | 2018         |
| 6                                                | Gr.Felt/Gr        | Waste water       | 45.04 mW/m <sup>2</sup>   | Soil         | 52         | 2019         |
| <b>Data with Reducing Potassium Ferricyanide</b> |                   |                   |                           |              |            |              |
| 7                                                | Gr/carbon cloth   | Fuel              | 2.3 mW/m <sup>2</sup>     | Liquid state | 51         | 2006         |
| 8                                                | Gr/Carbon brush   | Wastwater         | 260 mW/m <sup>2</sup>     | Liquid state | 34         | 2020         |
| 9                                                | Carbon/Gr paper   | Wastewater        | 181.78 mW/m <sup>2</sup>  | Liquid state | 35         | 2012         |
| 10                                               | Gr/Gr             | Acetate           | 166 mW/m <sup>2</sup>     | Liquid state | 24         | 2017         |
| 11                                               | Cu/Cu             | Ammonium chloride | 1785.20 mW/m <sup>2</sup> | Compost soil | Our work   | Present work |

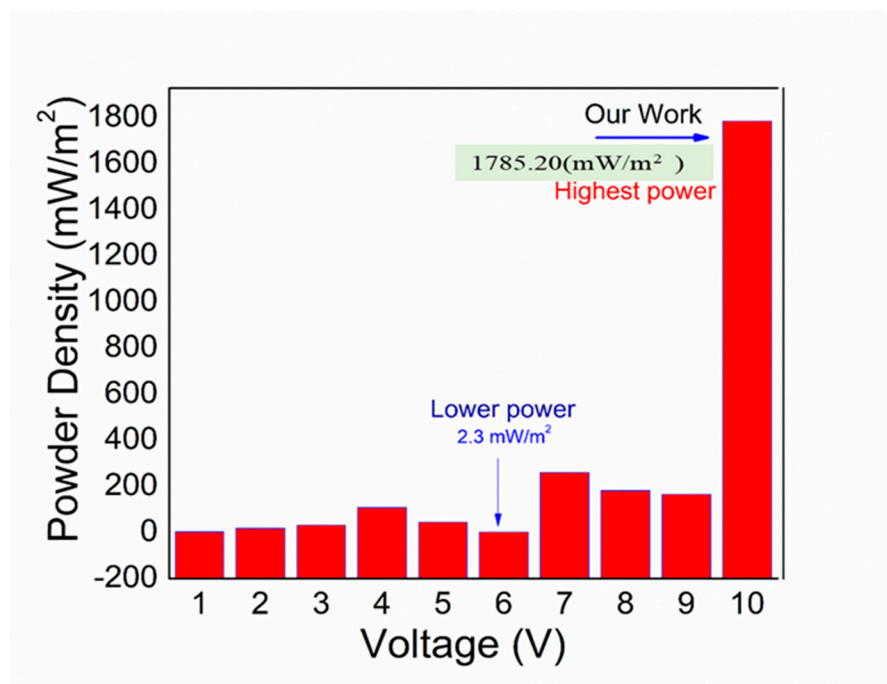

**Figure S5.** The comparison survey data of different soil fuel cells in survey with power density.

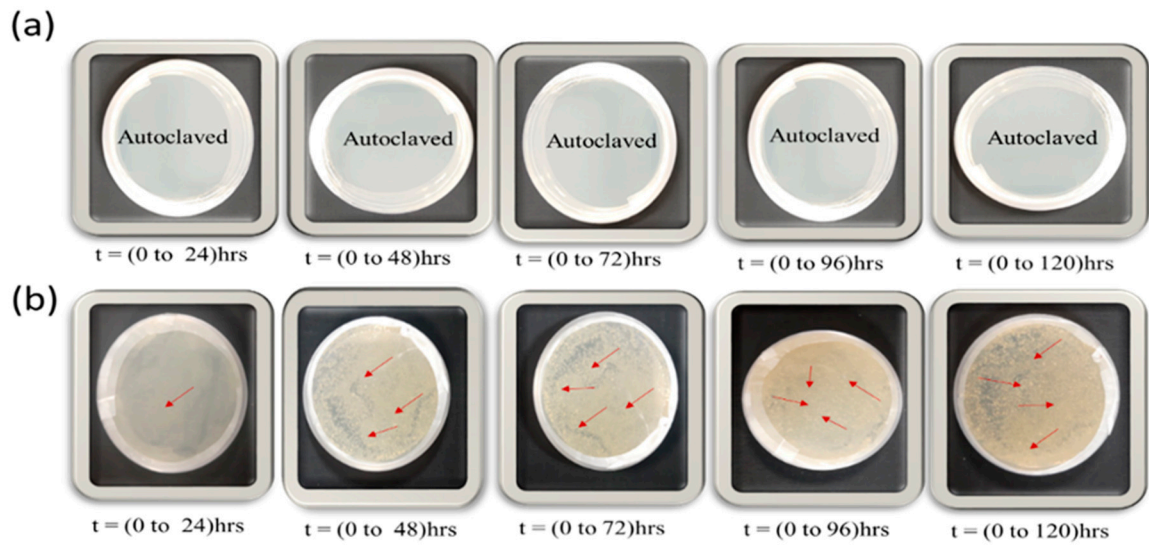

**Figure S6.** Showing the difference between the auto calved studies where the growth of the microbes is absent. In the 8(a) from 0 to 120 h and 8(b) showing the presence of the microbial growth from 0 to 120 h.
